# Supplementary material for: Advancements and continued challenges in global modelling and observations of atmospheric ice masses
Source: Copernicus journal article supplement (doi:10.5194/egusphere-2025-4634), 2025-10-15
Supplement: Supplementary file [file egusphere-2025-4634-AC3-supplement.pdf]

# Response to review by Karol Ćorko

*The manuscript by Eriksson et al. addresses a fundamental challenge in quantifying atmospheric ice mass in satellite retrievals, GCMs, and GSRMs. It includes large amount of results and summarises the main problems in both comparison between different observational products and their comparison with models. The paper is well written and organized but needs some changes before publishing.*

*Most of the following comments are rather questions to the authors to further explain their findings. However, several tables and figures are missing a full description and I recommend minor changes to the figures in order that the legends do not overlap with the plotted data. In some parts of the manuscript, I miss discussion/comparison of the results with the findings of others (see general and specific comments). Maybe the biggest issue I find is, to me, unclear satellite uncertainty. Do you find it as 10% as assumed in "satellite uncertainty" product (DARDAR  $\pm 10\%$  is chosen), or 15% which you bring in the conclusions as you have showed through your results, or 40% based on the other paper? This needs to be clear and I find it very strange that the result from another paper (Austin et al. (2009)) is given in the abstract as an estimate for uncertainty. There are also some minor comments regarding parts which need to be clearer in order for the reader to fully understand the content. Finally, I have given some suggestions which do not require a lot of additional work but that I feel would improve our understanding on retrieval uncertainty and their comparison with simulations.*

- We thank for finding our manuscript interesting and well written, and providing clear suggestions for improvements. Yes, in some parts we are brief, deliberately, in order to keep manuscript's length down. In our revision, we have added information, but still have considered the overall length of the manuscript. It is clear that we failed in describing the logic and definition of our "satellite uncertainty" used in the later sections. We have rewritten that part totally and are now not using the easy way out of referring to Austin et al.
- Please, find below replies to your comments. We gave emphasis to points where there are commonalities with the input from one or both of the other referees, still carefully considering all points raised.

## General comments

*Abstract + Conclusions: While the abstract overall gives a beautiful picture of what to expect from the article, I cannot but notice how authors' estimation of retrieval uncertainty of 40% is misleading and not a result of the analysis performed. As mentioned later in the text, that uncertainty is reported in Austin et al. (2009) for*

*FWC. In the conclusions, a 15% spread coming from the analysis is mentioned. I believe that this has to be clarified and reflected in the abstract and conclusions.*

- We have made several changes around this. The first part of the abstract has been rewritten. The section "3.6 Retrieval trueness" is totally rewritten, including a new discussion around the results in Sec 3.5 leading to 30% uncertainty (instead of 40%). A reference to Sec 3.6 has been added in the Conclusion, for increased clarity.

*In several figures, the legends overlap with portions of plotted data. Please reposition the legends outside of the plotting area or where they do not obscure lines.*

- We have changed figures to remove overlaps. We made no change to Fig. 13 as we think the overlap here does not cause any confusion at all.

*The captions under several tables (e.g. Table 3, Table 7) and figures do not clearly specify the geographic region and/or time period to which the results refer. Please revise the captions to provide this essential contextual information.*

- Information has been added.

*Given the length of the manuscript and the number of the results presented, it would also be helpful to restate the relevant time period in the main text when referring to tables or findings introduced in earlier sections. This would improve clarity for readers and reduce the need to look back through the manuscript for contextual information.*

- In general, we assume that the variability between time periods is considerable smaller than the deviations between datasets, and it is not critical to have the exact time period actively in memory when reading the text. However, this is not obvious in all parts. We should have been more clear when comparing results in Sec. 5 (for 24h, Feb 2020) with values from Sec. 3 (for 1:30, 2015). Comments and discussion have been added to Sec. 5. For example, CCIC has been added to both Table 6 and 7, clarifying that the statistical measures are quite similar despite the different time coverages.

*I would find it useful when describing own results to include information about others' findings. In some parts of the text, there is a nice comparison but on several occasions the text is written along the lines of "this has also been visualized/compared/analysed in..."*

- We hope the changes in response to all three referees have fixed these issues, at least the worst ones.

Satellite uncertainty in section 3.6, Figure 5 but also later leaves me with not being sure I understand what the grey area refers to (e.g. description in Figure 5: “The grey area represents the expected range according to older satellite observations (Sec. 3.6), based the zonal mean of DARDAR for July and August during 2007 to 2010)”. Could you describe more clearly what you consider as satellite uncertainty? Is it the mean values during those 4 years and adding  $\pm 10\%$  of the shaded area as described in Line 386? Also, does the DARDAR data here include only daytime or nighttime too? I would also appreciate if the authors could add the mean value line. I was wondering if the assumed uncertainty is larger than the standard deviation of the DARDAR data for the years given?

- As mentioned, we have rewritten Sec 3.6 from scratch, including to make a judgment more clearly based on Sec 3.5 (that was the idea from the start). We hope that the new text clarifies our approach. We prefer to not add the center of uncertainty ranges so to not clutter the figures, which in some cases already contain many lines.

Moreover, since you are comparing DARDAR and 2C-ICE extensively, I would recommend to include and compare that DARDAR data (2007–2010) with 2C-ICE (2007–2010). It is also available on open source: TIWP and CIWP data used for accepted JGR paper 2020JDo32848RR

- The logic behind the comment seem to be to check if differences between DARDAR and 2C-ICE vary between time periods. This is of course a relevant question, that we had considered but failed to discuss in the text. Based on results in Pfreundschuh et al. (2025), we argue that the results derived for 2015 are valid for the complete CloudSat era. Text has been added to Sec. 4.3 to clarify this, and this is also pointed out at the start of Sec. 3.

Table 4 does not include information about the period (neither specific year or season – I gather it refers to the annual 2015 mean? Since you use DARDAR 2007–2010 as reference data ( $\pm$  uncertainty), I think it would be useful to add the mean FWP for those years into the table, or later in the text, to understand overall multi-year variability of the data.

- The year has been added to the text of Table 4. We refer to the answer above for not expanding the table. To be clear, the logic is that in Secs. 3.1–3.6 we are only using data from 2015 (as we had ready collocations for that period). It is just for determining the uncertainty range in later parts we use 2007–10 means.

Generally, I am not sure what to expect from CCIC data but am a bit surprised with such large values since machine learning product uses passive remote sensing, especially in the tropics as I would expect that passive remote sensing will saturate fast (therefore, it is probably the result of ML statistics rather than retrieval?). I would appreciate if the authors could expand on it.

- We have expanded Sec 2.1.3, but the new text does not fully answer the question raised here. For more discussion, see the replies to Adam Sokol and referee #3.

Section 4.2: The section is a bit unclear to me and maybe some conclusions are not very easy to reach. The manuscript is already long, but maybe adding some text to the appendix would help readers.

- We have revised the section, in response to this comment and one by Adam Sokol.

I find Figure 9 very interesting. I would be very much interested, if possible, to see what annual cycles other satellite data has (even for shorten time period).

- It is encouraging that the figure raises interest, as we considered not including it to make the manuscript a bit shorter. However, we decide to not include any other satellite data. As CCIC closely resembles 2C-ICE regarding averages, it can be taken to also represent DARDAR and 2C-ICE. To add an additional dataset for a single figure would cause confusion (and would mean considerable amount of work). In addition, the main message of the figure is maybe not agreement with the observations, but the considerable deviations between the models.

General comment on GSRMs: Have you excluded the first 10 days of spin-up following Stevens et al. (2019), Lang et al., (2021), Corko et al. (2025 ...?

- Yes, that period was excluded. We are just using data from February (that was mentioned). A comment has been added in the introduction of Sec 5 for clarity.

In my opinion, it would be preferable if the authors compared the model results with observations at least with respect to the season during which the DYAMOND model simulations were conducted. Despite not being nudged, models were initiated with ECMWF SSTs and therefore the convection is highly influenced with the period of simulations.

- This is what has been done. The CCIC data are for February 2020, and the satellite uncertainty range in Fig 11 are based on CloudSat retrievals Jan–March 2007–10.

Section 5.2 (The tropical region): out of curiosity, do you know if convection is more active/stronger during northern summer than northern winter? I would think that this is the case also due to more land over the northern hemisphere. Would that impact the comparison of AC (%) and in particular CC (%) from the winter DYAMOND model and observations from Table 3 (please add to the captions the area and time period where missing)?

- As already indicated above, differences in time coverage between Secs. 3 and 5.2 need consideration. It is not just a matter of all-year 2015 vs. Feb 2020, but also coverage in local times (1:30 in Sec. 3 and 24h in Sec 5). Here CCIC comes in handy, as it can be used as a common reference. Accordingly, CCIC has been added to Table 7. The results of CCIC in Tables 3 and 7 are not identical, but are sufficiently similar to motivate using results from Sec. 3 for comparison. In fact, the relative poor retrieval performance at high FWP is a more limiting factor (that was noted already in the old manuscript).

Could you explain the 99.99 percentile? Are those outliers (1 or 2 cases or more)? I am surprised that, in 2C-ICE, it goes to nearly  $18\text{kg/m}^2$  while with DARDAR to only  $9.6\text{kg/m}^2$ ? In the convective case you showed in Figure 1, both DARDAR and 2C-ICE go up to nearly  $10\text{kg/m}^2$  in the convective core, as well as in figure 2. Can you show the scene of that 99.99 percentile case? Do you know what is so different in DARDAR for extreme cases compared not only to 2C-ICE but also to AOP nominal that constrains DARDAR FWP to cca  $10\text{kg/m}^2$  maximum?

- The statistics in Table 3 are based on about 4.75 million samples. Accordingly, there are about 475 samples above the 99.99th percentile. On purpose, we selected a scene range from thin clouds to FWP values towards the maximum, to illustrate the performance for a broad range of situations.
- We have added a discussion of the retrieval accuracy at high FWP, in Sec. 3.3.

Line 93: “Comparisons of 2C-ICE and DARDAR are surprisingly few; exceptions include Deng et al. (2013); Winker et al. (2024); Atlas et al. (2024).” It would be great if you cited those papers and their results when you compare DARDAR and 2C-ICE (I feel there is no unique answer regarding the differences between the two products). In my experience, I have always felt they were “less different” than what you show here. Do you have an idea what could be a reason for such a difference? Do you think it would be different if you analysed a different time period? For example, in Atlas et al. (2024), Figure3 shows that in winter period (February data from the years 2007–2012) FWP from DARDAR is substantially larger than in 2C-ICE (opposite to what you found in general (table 4/figure 4 etc...)). I feel that generally, this kind of discussions is missing in some parts of the manuscript.

- We don't discuss in detail why DARDAR and 2C-ICE are different, but we point out main differences in Sec. 2.1.2. They use different ways to separate between liquid and ice, and different particle models. In Sec. 3.5 it is mentioned that both these differences can lead to large systematic differences. Accordingly, we are not surprised that they differ, even in global mean FWP. The question is if there are common biases, causing them both to deviate from the true mean. In Sec 3.6 we argue that this can not be ruled out.

As discussed above, we have been considering the annual variation of global mean FWP, but we have not looked into the annual variation of FWP distributions. Again an interesting question, and strange that nobody has investigated (to our best knowledge). To include such an analysis in this study would risk distracting the reader from the main points, which are that there are significant differences between satellite retrievals, from local level up to global means. However, we can still point out weaknesses of atmospheric models with the observations. And by that we hope that satellite data will be used even more by the climate modeling community.

The study of Atlas et al (2024) is restricted to the tropics and in Fig 3 they sub-sample with respect to the presence of high clouds (as we understand it).

Accordingly, their Fig. 3 can not be compared directly to our Fig. 3.

## Specific comments:

*Line 26–28: “It is noteworthy that the data request document for the latest Coupled Model Intercomparison Project (CMIP6) in effect defines cloud ice as the ice categories considered by the model’s radiation scheme.” I feel citation would be good.*

- We specified this sentence and now refer to the CMIP6 data request website where the excel sheet with variable definitions can be found.

*Line 32–33: “Later studies comparing cloud ice from GCMs with various satellite observation include Eliasson et al. (2011); Li et al. (2012); Jiang et al. (2012); Komurcu et al. (2014); Li et al. (2020).” This is an example of only providing citations without any information. Could you provide their results or reason for their mention?*

- As pointed out, the sentence was vague and it has been removed. Most of the references were anyhow used further down in the text.

*Line 77–78: “In any case, total ice is still the only mass quantity that has a clear definition.” Could be expressed better.*

- Now phrased as "In any case, total ice is so far the only mass quantity defined consistently across models and observations."

*Line 78–80: “DARDAR and 2C–ICE have been used as the reference in many studies, but are generally used separately.” I think a few citations should be inserted after “many studies”.*

- Four examples have been added, two each for DARDAR and 2C–ICE.

*Line 81–82: “DARDAR and 2C–ICE do not offer sufficient coverage for addressing these questions and a dataset representing the state of the art for passive retrievals is also applied (denoted as CCIC).” CCIC has not been defined yet, so please define it. I understand from the text that it is a machine learning (ML) product based on passive observations. Therefore, I would not call it retrieval but how you mentioned ML product.*

- Neither DARDAR and 2C–ICE were defined. However, to properly introduce DARDAR, 2C–ICE and CCIC in this section would cause substantial distraction. Instead, references to the section where they are introduced have been added.
- Please note that we also use "product" together with the other retrievals considered. It is not fully clear if "product" is suggested in favor of "retrieval" because of ML or because passive data has been used. In any case, we argue that that CCIC can be denoted as a retrieval. ML is a new approach, but it solves the same task as traditional methods like OEM (a.k.a. 1D–var). For CCIC (and other ML retrievals) there is a clear formulation of what is optimized, like OEM.

*Line 102–103: “As older passive retrievals have been shown to have a strong bias with respect to CloudSat–based ones, they are excluded from this study.” What do you consider as older passive remote sensing? I feel citations are missing.*

- We have changed "older" to "traditional". The sub–sequent paragraph should make clear what we mean with traditional. There were citations, but placed at the start of the paragraph. Now moved into the sentence of concern.

*Section 2.1.3. Passive dataset. Could you explain it a bit more? I am not sure what to expect from this kind of product. IF 2C–ICE has certain amount of ice connected to certain region and season, e.g. over the tropics where passive sensors saturate fast (and will retrieve much lower FWP), machine learning will indicate that there is too low FWP (compared to 2C–ICE) and artificially prescribe statistics from 2C–ICE despite non–physical retrieval relative to passive remote sensing? In that sense, which part is coming from retrieved values from passive remote sensing and which from “copying” the 2C–ICE retrieval? I think it would be helpful to add a few sentences about the product.*

- Section 2.1.3 has been expanded due to comments from all three referees. For your question here, we point out that CCIC is not aware of the location or date. We would rather express it like that the machine learning model has learn to "interpolate" in an very advanced manner between all 2C-ICE retrievals found in the training data.

*Line 190–191: I would replace “resolution” into a grid spacing. “Resolution of 5 km” means that the model grid length is a fraction of that (say, around 1 km or less). Therefore, when one refers to the actual model grid length, then “resolution” should be replaced with “grid length”. “Resolution” can be used in a general sense, as in “low resolution models”. One can also say “5 km grid” in place of “grid length of 5 km”. I think there are a few places, also in the tables, where I feel it needs to be changed to grid spacing.*

- This has been changed.

*Figure 2: The information about the area of analysis is missing.*

- The area used has been added.

*Section 3.3 and text related to Figure 3: To me, it appears that PDFs of FWP (Figure 3a) are very similar and do not vary a lot. In my understanding, everything under 5 g/m<sup>2</sup> can be detected only by LIDAR, which also loses its sensitivity for <1 or 2 g/m<sup>2</sup>. Therefore, I am not sure if I would focus a lot on the FWP < 10<sup>−3</sup> kg/m<sup>2</sup>. Also, I believe PDF (Figure 3a y axis) should not have units. Regarding Figure 3b: could you please explain in more detail how you calculated it? I find values on y axis very low and very different than in the papers you have cited (e.g. Sokol and Hartmann (2020); Atlas et al. (2024)). I believe it is influenced by the number of bins?*

- Correct. A distraction to include bins below 1 g/m<sup>2</sup>. Figures have been changed accordingly.
- The unit of the PDFs in Fig. 3a should be clear from Eq. 1. Yes, the values in the occurrence fractions in Fig. 3b depend on the bin width, as pointed out in the paragraph below Eq. 2. In the text of Fig. 2 it is mentioned that we have used 200 bins.

*Figure 5: Even though I appreciate the effort to use newly available data, I would still be very careful about using and interpreting EarthCARE data, as it is still experimental and in the validation process. As authors may be familiar with, there will be a few products available regarding the FWP and the product they use is just one of them. Therefore, at this stage, I would rather exclude this experimental data. However, in case the authors want to keep and show it, it has to be clear in the text, caption related to the figure and the legend, that this is still experimental data, yet to*

be verified, and instead of using “Earthcare”, in the legend and elsewhere, the name of the product “CPR\_CLD\_2A” should be written because it could make an incorrect impression of EarthCARE data.

- Yes, we should for sure have been more clear about distinguishing between EarthCARE and CPR\_CLD\_2A. Anyhow, we have now removed CPR\_CLD\_2A from Fig. 5, following the advice here and after getting a better view of the status of the EarthCARE products through visiting a workshop.

Line 442–443: “When those outliers were excluded, the remaining models showed differences of about a factor of 6 – comparable to our findings.” This result is surprising as it would turn out that there is no overall improvement in the model spread between old CMIP3 and new CMIP6 generations. This is the opposite of what you mention in the abstract. Could you please comment on this and include citations in the results’ part that support the progress between the model generations?

- We removed the part of the abstract that can be interpreted as conflicting with our statement. The sentence in the abstract now reads: “Global circulation models continue to systematically underestimate frozen water paths compared to the observational benchmark and fail to provide a consistent representations of regional temporal changes or the annual cycle.”

Line 448: “Most models participating in the CMIP6 and CMIP6–HighRes underestimate the FWP when compared to satellite retrievals.” In my opinion, this is clearly an understatement. Nearly all models in Figure 7 underestimate FWP (except one in each group and some small parts of 3–4 models are barely within the “huge” uncertainty of satellite observations). This might change once it is clear what you mean by satellite uncertainty (see my general comment)

- We have replaced “Most models” with “Nearly all models” in line with the reviewer's suggestion. We believe that the remainder of the paragraph already provides the information needed to address the main point of the reviewer’s comment.

Line 469–471: “Despite the large variability of FWP in between the models, we can still conclude that none of the models overestimate FWP compared to the satellite retrieval, and therefore none of the models can be falsified. However, it must be considered unlikely that non–reported ice masses can explain the gap to the satellite range for all models.” I do not understand what the authors wanted to say here, e.g. “none of the models can be falsified”? Is it always “non–reported” ice as some GCMs include precipitating (snow) ice due to radiation scheme?

- Here we tried to be very formal, pointing out that there can be non-reported ice masses (even when including "snow" in IWP) that theoretically could move the models up to the satellite range. We pointed out this as very unlikely. Anyhow, the topic is in fact discussed elsewhere. Accordingly, we have simply removed the paragraph, in order to not cause confusion and make the manuscript a bit shorter.

*Figure 10(11) and related text: Since you are showing CCIC for February in Figure 10, why not include (calculate) its mean value and compare it with that value in DYAMOND models, instead of comparing mean FWP from models with annual CCIC and commenting it is about 3% lower than in February? That way, you would not need to speculate in the 1st paragraph in 5.1 section. In Figure 11, I appreciate the comparison with DARDAR for January to March in the years 2007–2010. Would you also consider adding CCIC zonal mean line from Figure 10? You are working with amazing data and interesting results which could, with minimum additional work, contribute to a very rich analysis (you could also calculate and comment the mean FWP for DARDAR 2007–2010 for January to March which is shown in Figure 11. As expected, it can already be seen in Figure 11 that, even though models mostly underestimate FWP, they are all in the range of DARDAR data when you compare it with the same winter season.*

- A good suggestion to add CCIC's mean to Table 6, simply done and allowed for simplifications in the text.
- For Fig. 11 we prefer to not add more datasets. The figure includes already many lines (bordering on too many). Furthermore, we prefer to not include results from specific retrievals, to not in any way indicate that this dataset stands out (when it comes to giving correct mean values). The full uncertainty range shall be considered.

*Line 544–546: "Model and observational distributions agree most closely at high occurrence fractions, where they exhibit similar peak values, while most models show higher fractions than the observations around  $\text{FWP} \approx 10^{-4} \text{ kg m}^{-2}$ ." As I already commented before, you are describing FWP of  $0.1 \text{ g/m}^2$ , values which observations will most probably not retrieve, not even lidar? Figure 12: Again, I do not understand such small values on y axis. See also my comment 11.*

- This text has been reformulated after removing the range below  $1 \text{ g/m}^2$ . See answer above for the relationship between the distributions values with the selected number of bins.

*Conclusion (Line 650–654): Here you mention that you showed around 15% spread, in the text for comparison with models, you assume DARDAR data as a reference with 10% spread, but in the abstract “estimate” uncertainty up to 40% (because what Austin et al 2009 found in their paper). And this 40% in the abstract, in my opinion, is misleading of what to expect from the paper since the spread you show is “much” lower. Also, mentioning that EarthCARE data could indicate the 40% uncertainty, based on preliminary, yet to be verified, one product would further mislead the reader and I find it not to be appropriate.*

- We were far from clear here. The value 15% was not actually established in the text, it was just a broad comment. This paragraph in the Conclusion builds upon Secs. 3.4 and 3.6, and we now refer to these sections for clarity. And the motivation in Secs. 3.4 and 3.6 regarding the numbers of concern should now hopefully be clear after textual changes in those sections.

### **Technical corrections:**

*A minor point: in several places the manuscript does not clearly distinguish between satellites and the instruments they carry (e.g., CALIOP lidar on CALIPSO, the radar on CloudSat/EarthCARE). This appears to be a writing oversight. Please review the text to ensure that satellites and their respective instruments are correctly identified throughout.*

- Yes, we were not fully clear on this point. Changes have been made to improve clarity.

*Line 39: GSMRs should be GSRMs*

- Changed.

*Line 432: “However, we still compare the observations following Waliser et al. (2009), Jiang et al. (2012), Li et al. (2020), and others.” – compare models/them with the observations*

- Changed.
